# Supplementary material for: Biodiversity and Bioprospecting of Fungal Endophytes from the Antarctic Plant Colobanthus quitensis
Source: MDPI journal article supplement (doi:10.3390/jof8090979), 2022-09-19
Supplement: s1 [file s1]

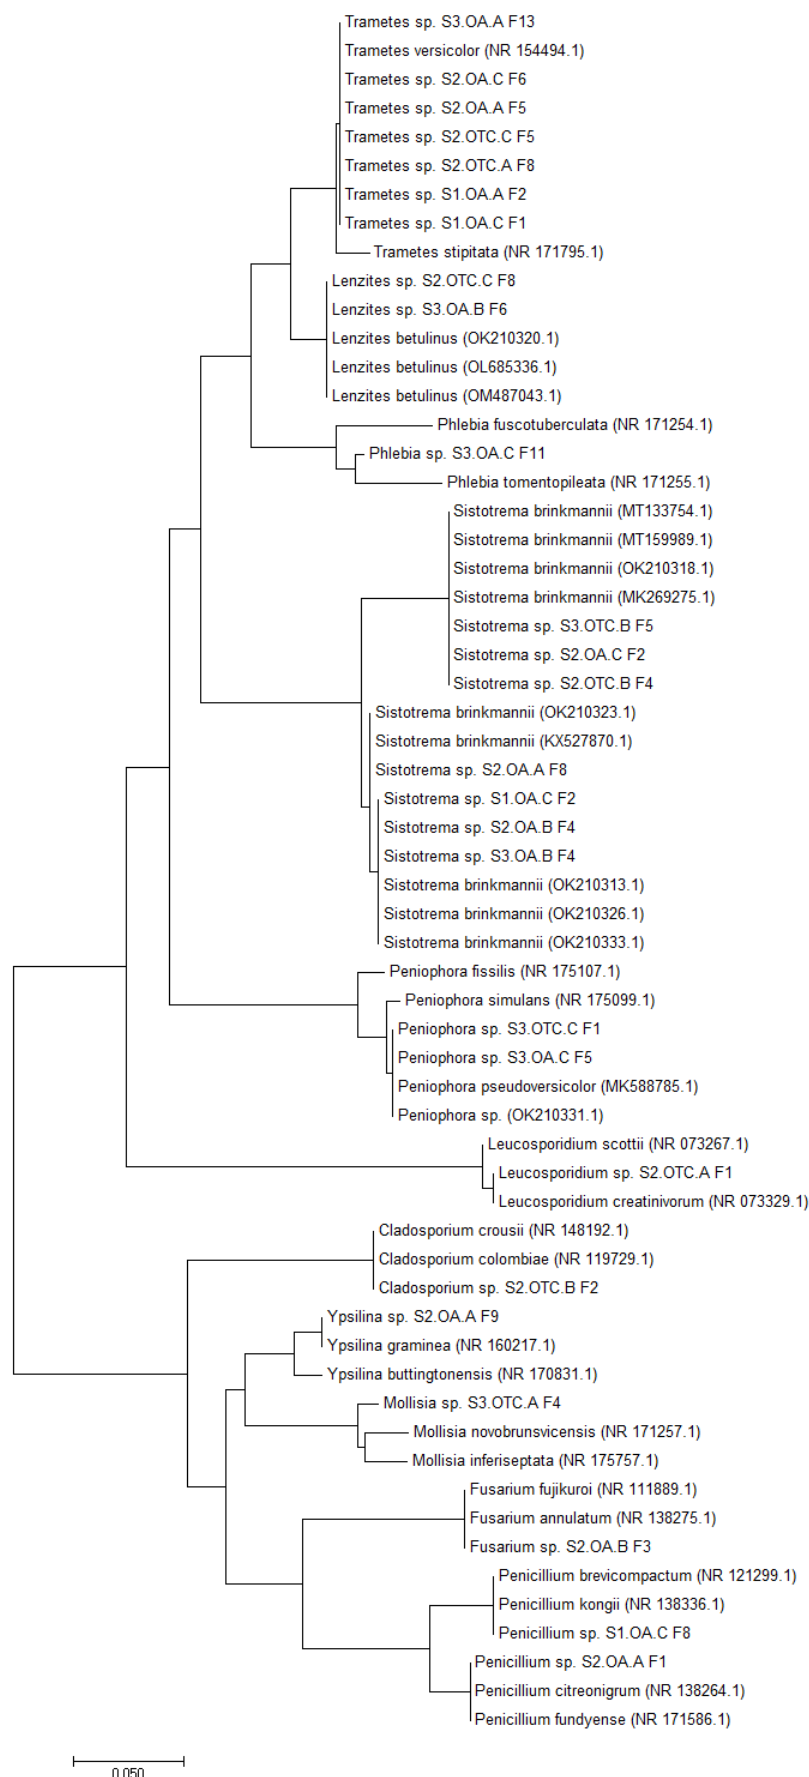

**Figure S1.** Phylogenetic tree of representative endophytic fungi of *Colobanthus quitensis*. The analysis was conducted with MEGA version 6.0 using the two best BLAST hits of ITS gene sequences at NCBI. The scale bar represents the number of substitutions per site.

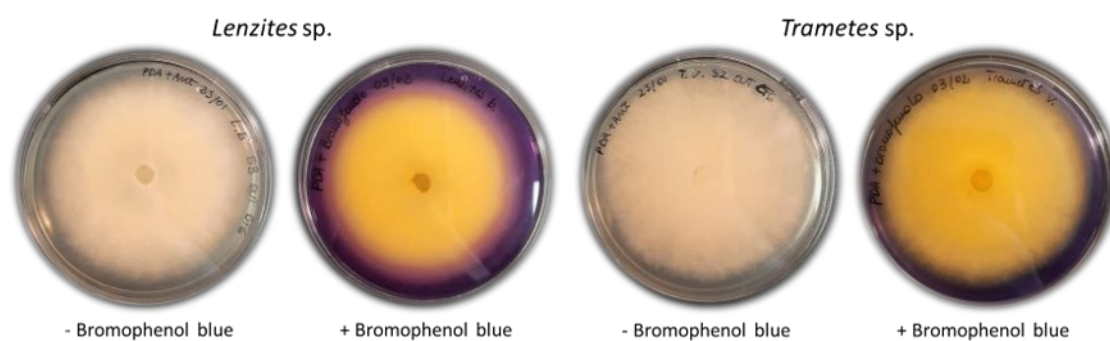

**Figure S2.** Representative images showing *Trametes sp.* S2.OA.C\_F6 and *Lenzites sp.* S3.OA.B\_F6 isolates grown for 7 days on PDA solid medium (pH 5.6) in the presence (+) or absence (-) of bromophenol blue, as a pH indicator (yellow, pH < 3.5; blue, pH > 4.6).

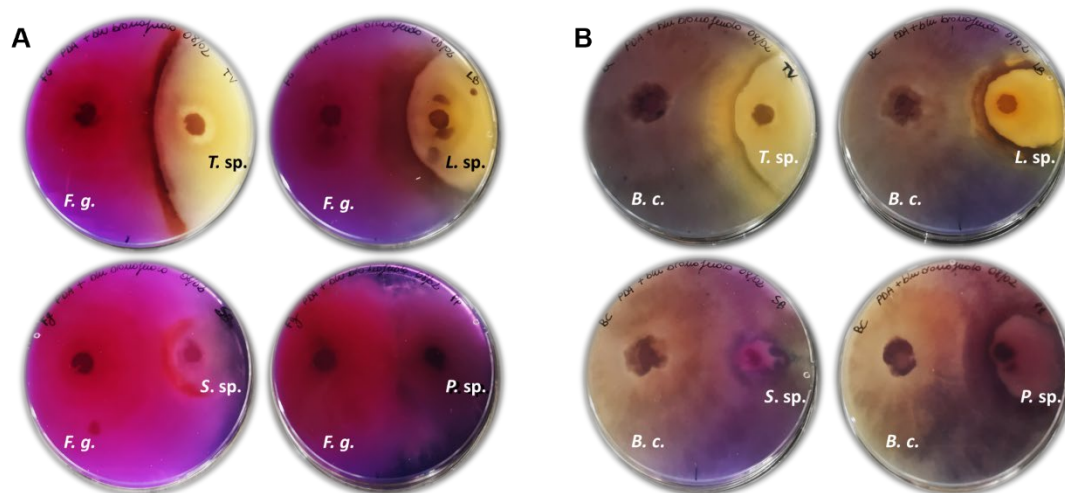

**Figure S3.** Co-cultivation of *Fusarium graminearum* (A) and *Botrytis cinerea* (B) (on the left of the plates) and Antarctic fungal isolates on PDA solid medium at 10 dpi in the presence of bromophenol blue, as a pH indicator. *F. g.*: *Fusarium graminearum*; *B. c.*: *Botrytis cinerea*; *T. sp.*: *Trametes* sp. S2.OA.C\_F6; *L. sp.*: *Lenzites* sp. S3.OA.B\_F6; *S. sp.*: *Sistotrema* sp. S1.OA.C\_F2; *P. sp.*: *Peniophora* sp. S3.OTC.C\_F1.

**Table S1.** Taxonomic annotation of representative endophytic fungi of *Colobanthus quitensis*. Fungi isolated from each *C. quitensis* biological replicate (named A, B and C) collected in open areas (OA) of the Antarctic site 1 (S1), site 2 (S2) and site 3 (S3) or inside open top chambers (OTC), which were present only in S2 and S3, were taxonomically annotated by the amplification of the fungal ITS region. Accession numbers of NCBI (<http://www.ncbi.nlm.nih.gov/sra>) are indicated for each fungal isolate.

| Representative fungal isolates |                           |                       |
|--------------------------------|---------------------------|-----------------------|
| Isolate code                   | Taxonomic annotation      | NCBI accession number |
| S1.OA.A_F2                     | <i>Trametes</i> sp.       | OK210311              |
| S1.OA.C_F1                     | <i>Trametes</i> sp.       | OK210312              |
| S1.OA.C_F2                     | <i>Sistotrema</i> sp.     | OK210313              |
| S1.OA.C_F8                     | <i>Penicillium</i> sp.    | OK210314              |
| S2.OTC.A_F1                    | <i>Leucosporidium</i> sp. | OK210315              |
| S2.OTC.A_F8                    | <i>Trametes</i> sp.       | OK210316              |
| S2.OTC.B_F2                    | <i>Cladosporium</i> sp.   | OK210317              |
| S2.OTC.B_F4                    | <i>Sistotrema</i> sp.     | OK210318              |
| S2.OTC.C_F5                    | <i>Trametes</i> sp.       | OK210319              |
| S2.OTC.C_F8                    | <i>Lenzites</i> sp.       | OK210320              |
| S2.OA.A_F1                     | <i>Penicillium</i> sp.    | OK210321              |
| S2.OA.A_F5                     | <i>Trametes</i> sp.       | OK210322              |
| S2.OA.A_F8                     | <i>Sistotrema</i> sp.     | OK210323              |
| S2.OA.A_F9                     | <i>Ypsilina</i> sp.       | OK210324              |
| S2.OA.B_F3                     | <i>Fusarium</i> sp.       | OK210325              |
| S2.OA.B_F4                     | <i>Sistotrema</i> sp.     | OK210326              |
| S2.OA.C_F2                     | <i>Sistotrema</i> sp.     | OK210327              |
| S2.OA.C_F6                     | <i>Trametes</i> sp.       | OK210328              |
| S3.OTC.A_F4                    | <i>Mollisia</i> sp.       | OK210329              |
| S3.OTC.B_F5                    | <i>Sistotrema</i> sp.     | OK210330              |
| S3.OTC.C_F1                    | <i>Peniophora</i> sp.     | OK210331              |
| S3.OA.A_F13                    | <i>Trametes</i> sp.       | OK210332              |
| S3.OA.B_F4                     | <i>Sistotrema</i> sp.     | OK210333              |
| S3.OA.B_F6                     | <i>Lenzites</i> sp.       | OM487043              |
| S3.OA.C_F5                     | <i>Peniophora</i> sp.     | OK210334              |
| S3.OA.C_F11                    | <i>Phlebia</i> sp.        | OK210335              |

**Table S2.** Highest cellulolytic and amylolytic activities of selected Antarctic fungal isolates detected *in vitro* on carboxymethylcellulose (CMC) or soluble starch. Optimal pH values are reported within brackets. Experiments were conducted in triplicate and standard deviation (SD) is reported.

| Fungal isolate                  | Cellulolytic activity on CMC<br>(nKat mL <sup>-1</sup> ) | Amylolytic activity on starch<br>(nKat mL <sup>-1</sup> ) |
|---------------------------------|----------------------------------------------------------|-----------------------------------------------------------|
| <i>Trametes</i> sp. S1.OA.A_F2  | 0.463 ± 0.04 (pH 7)                                      | 0.199 ± 0.03 (pH 7)                                       |
| <i>Trametes</i> sp. S2.OTC.C_F5 | 0.494 ± 0.05 (pH 4)                                      | 0.155 ± 0.02 (pH 7)                                       |
| <i>Trametes</i> sp. S2.OA.A_F5  | 0.201 ± 0.03 (pH 4)                                      | 0.513 ± 0.04 (pH 7)                                       |
| <i>Lenzites</i> sp. S3.OA.B_F6  | 0.182 ± 0.02 (pH 5)                                      | 4.676 ± 0.35 (pH 5)                                       |

**Table S3.** Total phenolic content (TPC) and total flavonoid content (TFC) of aqueous (Aq) or methanol (Met) extract of *Trametes* sp. S2.OA.C\_F6, *Lenzites* sp. S3.OA.B\_F6 and *Sistotrema* sp. S1.OA.C\_F2. Values were reported as mean  $\pm$  SD of triplicates.

| Fungal isolate                       | TPC (mg GAE g <sup>-1</sup> d.w.) | TFC (mg QE g <sup>-1</sup> d.w.) |
|--------------------------------------|-----------------------------------|----------------------------------|
| <i>Trametes</i> sp. S2.OA.C_F6 Aq    | 2.667 $\pm$ 0.017                 | 4.389 $\pm$ 0.016                |
| <i>Lenzites</i> sp. S3.OA.B_F6 Aq    | 4.087 $\pm$ 0.050                 | 5.516 $\pm$ 0.022                |
| <i>Sistotrema</i> sp. S1.OA.C_F2 Aq  | 1.086 $\pm$ 0.010                 | 1.626 $\pm$ 0.009                |
| <i>Trametes</i> sp. S2.OA.C_F6 Met   | 6.058 $\pm$ 0.056                 | 2.437 $\pm$ 0.024                |
| <i>Lenzites</i> sp. S3.OA.B_F6 Met   | 3.803 $\pm$ 0.031                 | 1.964 $\pm$ 0.001                |
| <i>Sistotrema</i> sp. S1.OA.C_F2 Met | 1.770 $\pm$ 0.013                 | 1.310 $\pm$ 0.014                |
